# Supplementary material
Source: bioRxiv or medRxiv preprint supplement (https://www.biorxiv.org/highwire/filestream/46898/field_highwire_adjunct_files/0/157578-1.pdf)
Supplement: Supplementary file [file 157578-1.pdf]

**Supplementary Table 1:** Publications using the analyzed ELISA kit (Pubmed search: “zonulin”, last updated 30.01.2017)

| Author (year)                        | Title                                                                                                                                                                    | Journal                                                 |
|--------------------------------------|--------------------------------------------------------------------------------------------------------------------------------------------------------------------------|---------------------------------------------------------|
| Damms-Machado, A. et al. (2017)      | Gut permeability is related to body weight, fatty liver disease, and insulin resistance in obese individuals undergoing weight reduction                                 | The American journal of clinical nutrition              |
| Ficek, Joanna et al. (2017)          | Relationship between plasma levels of zonulin, bacterial lipopolysaccharides, D-lactate and markers of inflammation in haemodialysis patients                            | International urology and nephrology                    |
| Mokkala, Kati et al. (2016)          | Gut Microbiota Richness and Composition and Dietary Intake of Overweight Pregnant Women Are Related to Serum Zonulin Concentration, a Marker for Intestinal Permeability | The Journal of nutrition                                |
| Mishra, Asha et al. (2016)           | Structural and Functional Changes in the Tight Junctions of Asymptomatic and Serology-negative First-degree Relatives of Patients With Celiac Disease                    | Journal of clinical gastroenterology                    |
| Li, Chuanwei et al. (2016)           | Zonulin Regulates Intestinal Permeability and Facilitates Enteric Bacteria Permeation in Coronary Artery Disease                                                         | Scientific reports                                      |
| Marlicz, Wojciech et al. (2016)      | Effect of colorectal cancer on the number of normal stem cells circulating in peripheral blood                                                                           | Oncology reports                                        |
| Ohlsson, Bodil et al. (2016)         | Two meals with different carbohydrate, fat and protein contents render equivalent postprandial plasma levels of calprotectin, cortisol, triglycerides and zonulin        | International journal of food sciences and nutrition    |
| Partty, Anna et al. (2016)           | Infantile Colic is Associated with Low-grade Systemic Inflammation                                                                                                       | Journal of pediatric gastroenterology and nutrition     |
| Serrano-Villar, Sergio et al. (2016) | Effects of Combined CCR5/Integrase Inhibitors-Based Regimen on Mucosal Immunity in HIV-Infected Patients Naive to Antiretroviral Therapy: A Pilot Randomized Trial       | PLoS pathogens                                          |
| Wosiewicz, Piotr et al. (2016)       | Portal vein thrombosis in cirrhosis is not associated with intestinal barrier disruption or increased platelet aggregability                                             | Clinics and research in hepatology and gastroenterology |
| Stenman, Lotta K. et al. (2016)      | Probiotic With or Without Fiber Controls Body Fat Mass, Associated With Serum Zonulin, in Overweight and Obese Adults-Randomized Controlled Trial                        | EBioMedicine                                            |
| Kume, Tuncay et al. (2016)           | The Relationship of Serum Zonulin Level with Clinical and Laboratory Parameters in Childhood Obesity                                                                     | Journal of clinical research in pediatric endocrinology |

|                                       |                                                                                                                                                                                                                                   |                                                                                                                                                  |
|---------------------------------------|-----------------------------------------------------------------------------------------------------------------------------------------------------------------------------------------------------------------------------------|--------------------------------------------------------------------------------------------------------------------------------------------------|
| Kuzma, Jessica N. et al. (2016)       | No differential effect of beverages sweetened with fructose, high-fructose corn syrup, or glucose on systemic or adipose tissue inflammation in normal-weight to obese adults: a randomized controlled trial                      | The American journal of clinical nutrition                                                                                                       |
| Vorobjova, Tamara et al. (2016)       | Circulating Zonulin Correlates with Density of Enteroviruses and Tolerogenic Dendritic Cells in the Small Bowel Mucosa of Celiac Disease Patients                                                                                 | Digestive diseases and sciences.                                                                                                                 |
| Iacomino, Giuseppe et al. (2016)      | Protective effects of ID331 Triticum monococcum gliadin on in vitro models of the intestinal epithelium                                                                                                                           | Food chemistry                                                                                                                                   |
| Frin, Anne-Claire et al. (2016)       | Accuracies of fecal calprotectin, lactoferrin, M2-pyruvate kinase, neopterin and zonulin to predict the response to infliximab in ulcerative colitis                                                                              | Digestive and liver disease: official journal of the Italian Society of Gastroenterology and the Italian Association for the Study of the Liver. |
| Funderburg, Nicholas T. et al. (2016) | Rosuvastatin Decreases Intestinal Fatty Acid Binding Protein (I-FABP), but Does Not Alter Zonulin or Lipopolysaccharide Binding Protein (LBP) Levels, in HIV-Infected Subjects on Antiretroviral Therapy                          | Pathogens & immunity                                                                                                                             |
| Barcelo, Antonia et al. (2016)        | Gut epithelial barrier markers in patients with obstructive sleep apnea                                                                                                                                                           | Sleep medicine                                                                                                                                   |
| Stadlbauer, Vanessa et al. (2015)     | Lactobacillus casei Shirota Supplementation Does Not Restore Gut Microbiota Composition and Gut Barrier in Metabolic Syndrome: A Randomized Pilot Study                                                                           | PloS one                                                                                                                                         |
| Zhang, Dongmei et al. (2015)          | Serum zonulin is elevated in women with polycystic ovary syndrome and correlates with insulin resistance and severity of anovulation                                                                                              | European journal of endocrinology                                                                                                                |
| Lukaszuk, Ewelina et al. (2015)       | Iron Status and Inflammation in Early Stages of Chronic Kidney Disease                                                                                                                                                            | Kidney & blood pressure research                                                                                                                 |
| Lamprecht, Manfred et al. (2015)      | Effects of zeolite supplementation on parameters of intestinal barrier integrity, inflammation, redoxbiology and performance in aerobically trained subjects                                                                      | Journal of the International Society of Sports Nutrition                                                                                         |
| Zhang, D. et al. (2014)               | Circulating zonulin levels in newly diagnosed Chinese type 2 diabetes patients                                                                                                                                                    | Diabetes research and clinical practice                                                                                                          |
| Chwist, Alina et al. (2014)           | A composite model including visfatin, tissue polypeptide-specific antigen, hyaluronic acid, and hematological variables for the diagnosis of moderate-to-severe fibrosis in nonalcoholic fatty liver disease: a preliminary study | Polskie Archiwum Medycyny Wewnętrznej.                                                                                                           |
| Pacifico, Lucia et al. (2014)         | Increased circulating zonulin in children with biopsy-proven nonalcoholic fatty liver disease                                                                                                                                     | World Journal of Gastroenterology                                                                                                                |
| Malyszko, Jolanta et al. (2014)       | Zonulin, iron status, and anemia in kidney transplant recipients: are they related?                                                                                                                                               | Transplantation proceedings                                                                                                                      |

|                                            |                                                                                                                                                                             |                                                          |
|--------------------------------------------|-----------------------------------------------------------------------------------------------------------------------------------------------------------------------------|----------------------------------------------------------|
| Orlando, Antonella et al. (2014)           | Lactobacillus GG restoration of the gliadin induced epithelial barrier disruption: the role of cellular polyamines                                                          | BMC microbiology                                         |
| Przybyłowski, P. et al. (2014)             | Zonulin and Iron Metabolism in Heart Transplant Recipients                                                                                                                  | Transplantation proceedings                              |
| Hunt, Peter W. et al. (2014)               | Gut epithelial barrier dysfunction and innate immune activation predict mortality in treated HIV infection                                                                  | The Journal of infectious diseases                       |
| Karakula-Juchnowicz, Hanna et al. (2014)   | The role of IgG hypersensitivity in the pathogenesis and therapy of depressive disorders                                                                                    | Nutritional neuroscience                                 |
| Klaus, Daniel A. et al. (2013)             | Increased plasma zonulin in patients with sepsis                                                                                                                            | Biochemia medica.                                        |
| Żak-Gołąb, Agnieszka et al. (2013)         | Gut Microbiota, Microinflammation, Metabolic Profile, and Zonulin Concentration in Obese and Normal Weight Subjects                                                         | International Journal of Endocrinology                   |
| Russo, Francesco et al. (2013)             | The effects of fluorouracil, epirubicin, and cyclophosphamide (FEC60) on the intestinal barrier function and gut peptides in breast cancer patients: an observational study | BMC cancer                                               |
| Gerdes, Sasha et al. (2012)                | Zonulin may not be a marker of autoimmunity in patients with psoriasis                                                                                                      | Acta dermatovenereologica                                |
| Russo, Francesco et al. (2012)             | Inulin-enriched pasta improves intestinal permeability and modifies the circulating levels of zonulin and glucagon-like peptide 2 in healthy young volunteers               | Nutrition research                                       |
| Moreno-Navarrete, Jose Maria et al. (2012) | Circulating zonulin, a marker of intestinal permeability, is increased in association with obesity-associated insulin resistance                                            | PloS one                                                 |
| Lamprecht, Manfred et al. (2012)           | Probiotic supplementation affects markers of intestinal barrier, oxidation, and inflammation in trained men; a randomized, double-blinded, placebo-controlled trial         | Journal of the International Society of Sports Nutrition |
| Skardelly, Marco et al. (2009)             | Expression of Zonulin, c-kit, and Glial Fibrillary Acidic Protein in Human Gliomas                                                                                          | Translational oncology                                   |
| Wex, Thomas et al. (2009)                  | Zonulin is not increased in the cardiac and esophageal mucosa of patients with gastroesophageal reflux disease                                                              | Peptides                                                 |

Note: The kit sold by other companies (e.g. ALPCO) is the same as the Immundiagnostik kit
